# Supplementary material for: Between-Sex Differences in Risk Factors for Cardiovascular Disease among Patients with Myocardial Infarction—A Systematic Review
Source: MDPI journal article supplement (doi:10.3390/jcm12155163), 2023-08-07
Supplement: s1 [file s1]

## MEDLINE search

(myocardial infarct\*[TI] OR acute coronar\*[TI] OR STEMI[TI] OR NONSTEMI[TI] OR NSTEMI[TI] OR ACS[TI] OR Acute Coronary Syndrome[TI]) AND (male[TI] OR female[TI] OR women[TI] OR men[TI] OR woman[TI] OR man [TI] OR sex [TI]) AND (prospective[abs] OR retrospective [abs] OR case-control\*[abs] OR cohort [abs] OR cross-sectional [abs] OR observational [abs])

## EMBASE search

#24 ((myocardial AND infarc\$:ti) OR (acute AND coronar\$:ti) OR (acute AND coronar\$:ti) OR stemi:ti OR nonstemi:ti OR nstemi:ti OR acs:ti OR (acute AND coronary AND syndrome:ti)) AND (male:ti OR female:ti OR wom\*n:ti OR (man OR men:ti) OR sex:ti) AND (prospective:ab OR retrospective:ab OR case\*control:ab OR cohort:ab OR cross\*sectional:ab OR observational:ab) AND [english]/lim AND [01-01-2012]/sd NOT [01-10-2022]/sd

#23 ((myocardial AND infarc\$:ti) OR (acute AND coronar\$:ti) OR (acute AND coronar\$:ti) OR stemi:ti OR nonstemi:ti OR nstemi:ti OR acs:ti OR (acute AND coronary AND syndrome:ti)) AND (male:ti OR female:ti OR wom\*n:ti OR (man OR men:ti) OR sex:ti) AND (prospective:ab OR retrospective:ab OR case\*control:ab OR cohort:ab OR cross\*sectional:ab OR observational:ab)

#22 prospective:ab OR retrospective:ab OR case\*control:ab OR cohort:ab OR cross\*sectional:ab OR observational:ab

#21 observational:ab

#20 cross\*sectional:ab

#19 cohort:ab

#18 case\*control:ab

#17 retrospective:ab

#16 prospective:ab

#15 male:ti OR female:ti OR wom\*n:ti OR (man OR men:ti) OR sex:ti

#14 sex:ti

#13 man OR men:ti

#12 wom\*n:ti

#11 female:ti

#10 male:ti

#9 (myocardial AND infarc\$:ti) OR (acute AND coronar\$:ti) OR (acute AND coronar\$:ti) OR stemi:ti OR nonstemi:ti OR nstemi:ti OR acs:ti OR (acute AND coronary AND syndrome:ti)

#8 acute AND coronary AND syndrome:ti

#7 acs:ti

#6 nstemi:ti

- #5 nonstemi:ti
- #4 stemi:ti
- #3 acute AND coronar\$:ti
- #2 acute AND coronar\$:ti
- #1 myocardial AND infarc\$:ti

#### **CENTRAL**

- #1 (acute coronar\*):ti
- #2 (myocardial infarct\*):ti
- #3 (STEMI):ti
- #4 (NONSTEMI):ti
- #5 (NSTEMI):ti
- #6 (ACS):ti
- #7 (acute coronary syndrome):ti
- #8 #1 or #2 or #3 or #4 or #5 or #6 or #7
- #9 (male):ti
- #10 (female):ti
- #11 (women):ti
- #12 (men):ti
- #13 (woman):ti
- #14 (man):ti
- #15 (sex):ti
- #16 #9 or #10 or #11 or #12 or #13 or #14 or #15
- #17 #8 and #16
