# Supplementary material for: Between-Sex Differences in Risk Factors for Cardiovascular Disease among Patients with Myocardial Infarction—A Systematic Review
Source: MDPI journal article supplement (doi:10.3390/jcm12155163), 2023-08-07
Supplement: s1 [file s1]

| Study                                                                 | Selection | Comparability | Outcome | Total | Quality of Study |
|-----------------------------------------------------------------------|-----------|---------------|---------|-------|------------------|
| Ahmadi et al. 2015                                                    | ***       | **            | **      | 7     | High             |
| Asleh et al. (2022)                                                   | ****      | **            | ***     | 9     | High             |
| Bajaj et al. (2016)                                                   | ***       | **            | **      | 7     | High             |
| Baumann et al. (2016)                                                 | ****      | **            | ***     | 9     | High             |
| Canto et al. (2012)                                                   | ****      | **            | ***     | 9     | High             |
| Dreyer et al. (2013)                                                  | ****      | **            | ***     | 9     | High             |
| Gardarsdottir et al. (2022)                                           | ****      | **            | ***     | 9     | High             |
| Khraishah et al. (2021)                                               | ***       | **            | **      | 7     | High             |
| Krishnamurthy et al. (2019)                                           | ****      | **            | ***     | 9     | High             |
| Leurent et al. (2014)                                                 | ***       | **            | ***     | 8     | High             |
| Nguyen et al. (2014)                                                  | ****      | **            | **      | 8     | High             |
| Ortalani et al. (2013)                                                | ***       | **            | ***     | 8     | High             |
| Radovanovic et al. (2012)                                             | ****      | **            | ***     | 9     | High             |
| Redfors et al. (2015)                                                 | ****      | **            | ***     | 9     | High             |
| Roque et al. (2020)                                                   | ***       | **            | *       | 6     | Medium           |
| Strömbäck et al. (2017)                                               | ****      | **            | ***     | 9     | High             |
| Velders et al. (2013)                                                 | ****      | **            | ***     | 9     | High             |
| Result of Risk of Bias Assessment as per Newcastle-Ottawa Scale [24]. |           |               |         |       |                  |

Each star represents one point within each respective category of the Newcastle-Ottawa quality assessment scale for cohort studies. The star system is recommended by the original assessment scale itself. There are a maximum of 4 stars available for the selection category, 2 for comparability and 3 for outcome, yielding a maximum score of 9. The original template assessment scale itself describes the requirements for each star in each category [24].
